# Supplementary material
Source: HighWire-hosted journal article supplement (https://jnm.snmjournals.org/highwire/filestream/94008/field_highwire_adjunct_files/1/060186_Supplemental_Table_1.pdf)
Supplement: 060186_Supplemental_Table_1.pdf [file 060186_Supplemental_Table_1.pdf]

Supplemental Table 1. Unconstrained two-tissue compartment model using two hours of data: rate constants, distribution volumes, and goodness of fit in eleven brain regions

| Region                 | Rate constants                                                |                                       |                                       |                                       | Distribution volumes            |                                           | Goodness of fit |           |
|------------------------|---------------------------------------------------------------|---------------------------------------|---------------------------------------|---------------------------------------|---------------------------------|-------------------------------------------|-----------------|-----------|
|                        | $K_1$ (mL • cm <sup>-3</sup> • min <sup>-1</sup> )<br>(SE(%)) | $k_2$ (min <sup>-1</sup> )<br>(SE(%)) | $k_3$ (min <sup>-1</sup> )<br>(SE(%)) | $k_4$ (min <sup>-1</sup> )<br>(SE(%)) | $BP_{ND}$ (unitless)<br>(SE(%)) | $V_T$ (mL • cm <sup>-3</sup> )<br>(SE(%)) | AIC             | MSC       |
| Frontal cortex         | 0.06 ± 0.02<br>( 4.0 )                                        | 0.21 ± 0.25<br>( 10.6 )               | 0.139 ± 0.18<br>( 10.3 )              | 0.023 ± 0.012<br>( 6.1 )              | 5.0 ± 2.4<br>( 8.4 )            | 2.1 ± 0.6<br>( 2.2 )                      | 136 ± 18        | 4.0 ± 0.8 |
| Parietal cortex        | 0.06 ± 0.026<br>( 3.4 )                                       | 0.21 ± 0.26<br>( 9.7 )                | 0.127 ± 0.15<br>( 10.6 )              | 0.024 ± 0.013<br>( 5.8 )              | 4.6 ± 1.8<br>( 8.3 )            | 2.1 ± 0.6<br>( 2.1 )                      | 139 ± 20        | 4.1 ± 0.9 |
| Occipital cortex       | 0.10 ± 0.036<br>( 5.1 )                                       | 0.34 ± 0.33<br>( 10.8 )               | 0.141 ± 0.12<br>( 10.3 )              | 0.026 ± 0.011<br>( 5.5 )              | 5.1 ± 1.8<br>( 8.4 )            | 2.2 ± 0.7<br>( 2.0 )                      | 174 ± 19        | 3.8 ± 0.6 |
| Temporal cortex*       | 0.07 ± 0.027<br>( 4.2 )                                       | 0.27 ± 0.33<br>( 10.3 )               | 0.152 ± 0.17<br>( 10.3 )              | 0.024 ± 0.011<br>( 5.4 )              | 5.6 ± 2.5<br>( 8.5 )            | 2.3 ± 0.6<br>( 2.0 )                      | 150 ± 17        | 3.9 ± 0.7 |
| Medial Temporal cortex | 0.05 ± 0.01<br>( 5.1 )                                        | 0.18 ± 0.09<br>( 14.9 )               | 0.115 ± 0.06<br>( 13.4 )              | 0.021 ± 0.011<br>( 8.2 )              | 5.7 ± 1.3<br>( 11.7 )           | 2.1 ± 0.7<br>( 3.5 )                      | 148 ± 16        | 3.2 ± 0.9 |
| Caudate                | 0.06 ± 0.03<br>( 6.2 )                                        | 0.34 ± 0.66<br>( 14.6 )               | 0.136 ± 0.23<br>( 18.8 )              | 0.022 ± 0.012<br>( 13.3 )             | 4.5 ± 3.9<br>( 12.4 )           | 1.7 ± 0.4<br>( 4.9 )                      | 170 ± 13        | 3.1 ± 0.5 |
| Putamen                | 0.07 ± 0.02<br>( 6.1 )                                        | 0.19 ± 0.15<br>( 17.7 )               | 0.107 ± 0.10<br>( 17.5 )              | 0.027 ± 0.014<br>( 9.3 )              | 3.7 ± 1.4<br>( 14.7 )           | 2.0 ± 0.6<br>( 3.0 )                      | 176 ± 14        | 3.4 ± 0.7 |
| Cingulate              | 0.07 ± 0.03<br>( 6.0 )                                        | 0.25 ± 0.18<br>( 15.7 )               | 0.133 ± 0.10<br>( 18.8 )              | 0.024 ± 0.012<br>( 7.2 )              | 5.3 ± 1.2<br>( 11.9 )           | 2.1 ± 0.6<br>( 2.7 )                      | 165 ± 11        | 3.4 ± 0.5 |
| Thalamus               | 0.06 ± 0.02<br>( 4.3 )                                        | 0.24 ± 0.22<br>( 11.5 )               | 0.133 ± 0.10<br>( 9.4 )               | 0.020 ± 0.008<br>( 5.3 )              | 6.3 ± 1.4<br>( 8.6 )            | 2.4 ± 0.7<br>( 2.1 )                      | 142 ± 11        | 3.7 ± 0.8 |
| Pons                   | 0.10 ± 0.16<br>( 5.3 )                                        | 0.81 ± 1.97<br>( 13.8 )               | 0.133 ± 0.14<br>( 12.9 )              | 0.015 ± 0.006<br>( 8.7 )              | 7.9 ± 3.8<br>( 10.7 )           | 2.4 ± 0.7<br>( 4.5 )                      | 151 ± 19        | 3.4 ± 0.6 |
| Cerebellum             | 0.08 ± 0.02<br>( 4.3 )                                        | 0.29 ± 0.25<br>( 9.6 )                | 0.141 ± 0.13<br>( 8.1 )               | 0.022 ± 0.007<br>( 4.7 )              | 6.0 ± 2.9<br>( 6.9 )            | 2.2 ± 0.7<br>( 1.7 )                      | 146 ± 27        | 4.1 ± 1.1 |

Values are mean ± SD from seven healthy subjects, and were calculated from 2 h brain and plasma data.

For each brain region, **percent standard error (SE(%))** is listed in parentheses below the variable and expressed as % of the variable itself.

Abbreviations: \* includes all of the temporal lobe except the medial temporal cortex.  $BP_{ND}$  binding potential relative to nondisplaceable uptake

$V_T$  total distribution volume; AIC Akaike Information Criterion; MSC Model Selection Criterion
